# Supplementary material
Source: PubMed Central journal article supplement (PMC4512552)
Supplement: 10.1534_115.176818_genetics.115.176818-1.pdf [file 10.1534_115.176818_genetics.115.176818-1.pdf]

SUPPORTING INFORMATION

GENETIC VARIABILITY UNDER THE SEEDBANK COALESCENT

J. BLATH, A. GONZÁLEZ CASANOVA, B. ELDON, N. KURT,  
M. WILKE BERENGUER

## File S1      Proofs and further recursive formulas

### Expectation and variance of the $T_{\text{MRCA}}$

For  $n, m \in \mathbb{N}_0$ , let  $t_{n,m} := \mathbb{E}_{n,m}[T_{\text{MRCA}}]$  and  $v_{n,m} := \mathbb{V}_{n,m}[T_{\text{MRCA}}]$ .

**Proposition S1.1.** *Let  $n, m \in \mathbb{N}_0$ . Then we have the following recursive representations*

$$\mathbb{E}_{n,m}[T_{\text{MRCA}}] = t_{n,m} = \lambda_{n,m}^{-1} + \alpha_{n,m}t_{n-1,m} + \beta_{n,m}t_{n-1,m+1} + \gamma_{n,m}t_{n+1,m-1}, \quad (\text{S1})$$

$$\begin{aligned} \mathbb{V}_{n,m}[T_{\text{MRCA}}] = v_{n,m} &= \lambda_{n,m}^{-2} + \alpha_{n,m}v_{n-1,m} + \beta_{n,m}v_{n-1,m+1} + \gamma_{n,m}v_{n+1,m-1} \\ &\quad + \alpha_{n,m}t_{n-1,m}^2 + \beta_{n,m}t_{n-1,m+1}^2 + \gamma_{n,m}t_{n+1,m-1}^2 \\ &\quad - \left(\alpha_{n,m}t_{n-1,m} + \beta_{n,m}t_{n-1,m+1} + \gamma_{n,m}t_{n+1,m-1}\right)^2, \end{aligned} \quad (\text{S2})$$

with initial conditions  $t_{1,0} = t_{0,1} = v_{1,0} = v_{0,1} = 0$ .

*Proof of Proposition S1.1.* Let  $\tau_1$  denote the time of the first jump of the process  $(N_t, M_t)_{t \geq 0}$ . If started at  $(n, m)$ , this is an exponential random variable with parameter  $\lambda_{n,m}$ . Applying the strong Markov property we obtain

$$\begin{aligned} t_{n,m} &= \mathbb{E}_{n,m}[\tau_1] + \mathbb{E}_{n,m}[\mathbb{E}_{N_{\tau_1}, M_{\tau_1}}[T_{\text{MRCA}}]] \\ &= \lambda_{n,m}^{-1} + \alpha_{n,m}t_{n-1,m} + \beta_{n,m}t_{n-1,m+1} + \gamma_{n,m}t_{n+1,m-1}. \end{aligned}$$

Similarly, the strong Markov property (telling us that  $\tau_1$  is independent of the time to the most recent common ancestor of the (random) sample  $(N_{\tau_1}, M_{\tau_1})$ ) and the law of total

variance yields

$$\begin{aligned} v_{n,m} &= \mathbb{V}_{n,m}[\tau_1] + \mathbb{E}_{n,m}[\mathbb{V}_{N_{\tau_1}, M_{\tau_1}}[T_{\text{MRCA}}]] + \mathbb{V}_{n,m}[\mathbb{E}_{N_{\tau_1}, M_{\tau_1}}[T_{\text{MRCA}}]] \\ &= \lambda_{n,m}^{-2} + \mathbb{E}_{n,m}[\mathbb{V}_{N_{\tau_1}, M_{\tau_1}}[T_{\text{MRCA}}]] + \mathbb{V}_{n,m}[\mathbb{E}_{N_{\tau_1}, M_{\tau_1}}[T_{\text{MRCA}}]]. \end{aligned}$$

We have

$$\mathbb{E}_{n,m}[\mathbb{V}_{N_{\tau_1}, M_{\tau_1}}[T_{\text{MRCA}}]] = \alpha_{n,m}v_{n-1,m} + \beta_{n,m}v_{n-1,m+1} + \gamma_{n,m}v_{n+1,m-1}$$

and

$$\begin{aligned} \mathbb{V}_{n,m}[\mathbb{E}_{N_{\tau_1}, M_{\tau_1}}[T_{\text{MRCA}}]] &= \mathbb{E}_{n,m}[\mathbb{E}_{N_{\tau_1}, M_{\tau_1}}[T_{\text{MRCA}}]^2] - \mathbb{E}_{n,m}[\mathbb{E}_{N_{\tau_1}, M_{\tau_1}}[T_{\text{MRCA}}]]^2 \\ &= \alpha_{n,m}t_{n-1,m}^2 + \beta_{n,m}t_{n-1,m+1}^2 + \gamma_{n,m}t_{n+1,m-1}^2 \\ &\quad - (\alpha_{n,m}t_{n-1,m} + \beta_{n,m}t_{n-1,m+1} + \gamma_{n,m}t_{n+1,m-1})^2. \end{aligned}$$

Combining the observations proves the result.  $\square$

## Expectation and variance of the total tree length

Let  $l_{n,m}^{(a)} := \mathbb{E}_{n,m}[L^{(a)}]$  and  $l_{n,m}^{(d)} := \mathbb{E}_{n,m}[L^{(d)}]$  denote the expectations, and  $w_{n,m}^{(a)} := \mathbb{V}_{n,m}[L^{(a)}]$  and  $w_{n,m}^{(d)} := \mathbb{V}_{n,m}[L^{(d)}]$  the variances of the total tree lengths, and define the mixed second moment,  $w_{n,m}^{(a,d)} := \mathbb{E}_{n,m}[L^{(a)}L^{(d)}]$ .

**Proposition S1.2** (Recursion: Total tree length). *For  $n, m \in \mathbb{N}$  we have*

$$l_{n,m}^{(a)} = n\lambda_{n,m}^{-1} + \alpha_{n,m}l_{n-1,m}^{(a)} + \beta_{n,m}l_{n-1,m+1}^{(a)} + \gamma_{n,m}l_{n+1,m-1}^{(a)} \quad (\text{S3})$$

$$l_{n,m}^{(d)} = m\lambda_{n,m}^{-1} + \alpha_{n,m}l_{n-1,m}^{(d)} + \beta_{n,m}l_{n-1,m+1}^{(d)} + \gamma_{n,m}l_{n+1,m-1}^{(d)}, \quad (\text{S4})$$

and

$$\begin{aligned}
w_{n,m}^{(a)} &= n^2 \lambda_{n,m}^{-2} + \alpha_{n,m} w_{n-1,m}^{(a)} + \beta_{n,m} w_{n-1,m+1}^{(a)} + \gamma_{n,m} w_{n+1,m-1}^{(a)} \\
&\quad + \alpha_{n,m} (l_{n-1,m}^{(a)})^2 + \beta_{n,m} (l_{n-1,m+1}^{(a)})^2 + \gamma_{n,m} (l_{n+1,m-1}^{(a)})^2 \\
&\quad - \left( \alpha_{n,m} l_{n-1,m}^{(a)} + \beta_{n,m} l_{n-1,m+1}^{(a)} + \gamma_{n,m} l_{n+1,m-1}^{(a)} \right)^2,
\end{aligned} \tag{S5}$$

$$\begin{aligned}
w_{n,m}^{(d)} &= m^2 \lambda_{n,m}^{-2} + \alpha_{n,m} w_{n-1,m}^{(d)} + \beta_{n,m} w_{n-1,m+1}^{(d)} + \gamma_{n,m} w_{n+1,m-1}^{(d)} \\
&\quad + \alpha_{n,m} (l_{n-1,m}^{(d)})^2 + \beta_{n,m} (l_{n-1,m+1}^{(d)})^2 + \gamma_{n,m} (l_{n+1,m-1}^{(d)})^2 \\
&\quad - \left( \alpha_{n,m} l_{n-1,m}^{(d)} + \beta_{n,m} l_{n-1,m+1}^{(d)} + \gamma_{n,m} l_{n+1,m-1}^{(d)} \right)^2,
\end{aligned} \tag{S6}$$

$$w_{n,m}^{(a,d)} = 2nm \lambda_{n,m}^{-2} + \alpha_{n,m} w_{n-1,m}^{(a,d)} + \beta_{n,m} w_{n-1,m+1}^{(a,d)} + \gamma_{n,m} w_{n+1,m-1}^{(a,d)}. \tag{S7}$$

*Proof of Proposition S1.2.* The result can easily be obtained observing that each stretch of time of length  $\tau$  in which we have a constant number of  $n$  active blocks and  $m$  dormant blocks contributes with  $n\tau$  to the total active tree length, and with  $m\tau$  to the total dormant tree length. Thus we have

$$l_{n,m}^{(a)} = n \mathbb{E}_{n,m}[\tau_1] + \mathbb{E}_{n,m}[\mathbb{E}_{N_{\tau_1}, M_{\tau_1}}[L^{(a)}]],$$

and we proceed as in the proof of Proposition S1.1. From these quantities we easily obtain the expected total tree length as  $l_{n,m}^{(a)} + l_{n,m}^{(d)}$ . Moreover,

$$\text{Cov}_{n,m}(L^{(a)}, L^{(d)}) = w_{n,m}^{(a,d)} - w_{n,m}^{(a)} w_{n,m}^{(d)}.$$

□

## Expectation of total length of external branches

To derive recursions for the total length of external branches in either of the two states is a little more involved, since obviously a coalescence can happen between either two external active branches, two internal active branches, or an external and an internal active branch. We use indices  $(n, n', m, m')$  to denote the number of external active branches, internal active branches, external dormant branches, and internal dormant branches, respectively. Abbreviate

$$\begin{aligned}\alpha_{n,n',m,m'}^{(1)} &:= \frac{\binom{n}{2}}{\lambda_{n+n',m+m'}}, & \alpha_{n,n',m,m'}^{(2)} &:= \frac{\binom{n'}{2}}{\lambda_{n+n',m+m'}}, & \alpha_{n,n',m,m'}^{(3)} &:= \frac{nn'}{\lambda_{n+n',m+m'}}, \\ \beta_{n,n',m,m'}^{(1)} &:= \frac{cn}{\lambda_{n+n',m+m'}}, & \beta_{n,n',m,m'}^{(2)} &:= \frac{cn'}{\lambda_{n+n',m+m'}}, \\ \gamma_{n,n',m,m'}^{(1)} &:= \frac{cKm}{\lambda_{n+n',m+m'}}, & \gamma_{n,n',m,m'}^{(2)} &:= \frac{cKm'}{\lambda_{n+n',m+m'}}.\end{aligned}$$

Let  $E^{(a)}$  denote the total length of external branches in the plant state, and  $E^{(d)}$  the total length of external branches in the seed state. Then we have

**Proposition S1.3** (Recursion: Total length of external branches). *For  $n, m \in \mathbb{N}$ , we have the representation*

$$\mathbb{E}_{n,m}[E^{(a)}] = e_{n,0,m,0}^{(a)}, \quad \mathbb{E}_{n,m}[E^{(d)}] = e_{n,0,m,0}^{(d)},$$

where  $e_{n,n',m,m'}^{(a)}$  and  $e_{n,n',m,m'}^{(d)}$ ,  $n, n', m, m' \in \mathbb{N}_0$  satisfy the recursions

$$\begin{aligned}e_{n,n',m,m'}^{(a)} &= n\lambda_{n+n',m+m'}^{-1} \\ &+ \alpha_{n,n',m,m'}^{(1)}e_{n-2,n'+1,m,m'}^{(a)} + \alpha_{n,n',m,m'}^{(2)}e_{n,n'-1,m,m'}^{(a)} + \alpha_{n,n',m,m'}^{(3)}e_{n-1,n',m,m'}^{(a)} \\ &+ \beta_{n,n',m,m'}^{(1)}e_{n-1,n',m+1,m'}^{(a)} + \beta_{n,n',m,m'}^{(2)}e_{n,n'-1,m,m'+1}^{(a)} \\ &+ \gamma_{n,n',m,m'}^{(1)}e_{n+1,n',m-1,m'}^{(a)} + \gamma_{n,n',m,m'}^{(2)}e_{n,n'+1,m,m'-1}^{(a)}\end{aligned}$$

and

$$\begin{aligned}
e_{n,n',m,m'}^{(d)} &= m\lambda_{n+n',m+m'}^{-1} \\
&+ \alpha_{n,n',m,m'}^{(1)} e_{n-2,n'+1,m,m'}^{(d)} + \alpha_{n,n',m,m'}^{(2)} e_{n,n'-1,m,m'}^{(d)} + \alpha_{n,n',m,m'}^{(3)} e_{n-1,n',m,m'}^{(d)} \\
&+ \beta_{n,n',m,m'}^{(1)} e_{n-1,n',m+1,m'}^{(d)} + \beta_{n,n',m,m'}^{(2)} e_{n,n'-1,m,m'+1}^{(d)} \\
&+ \gamma_{n,n',m,m'}^{(1)} e_{n+1,n',m-1,m'}^{(d)} + \gamma_{n,n',m,m'}^{(2)} e_{n,n'+1,m,m'-1}^{(d)}
\end{aligned}$$

Observing that  $e_{0,n',0,m'}^{(a)} = e_{0,n',0,m'}^{(d)} = 0$  for all  $n', m'$ , and  $e_{1,0,0,0}^{(a)} = e_{1,0,0,0}^{(d)} = 0$ , and that the total number  $n + n' + m + m'$  is non-increasing, these recursions can be solved iteratively.

*Proof of Proposition S1.3.* This follows by a similar first-step analysis as in Proposition S1.2, taking into account the transitions for internal and external branches, and observing that at each coalescence event between two external branches, the number of external plant branches is reduced by two and the number of internal branches is increased by one, in a coalescence of an external and an internal branch, the number of external plant branches is reduced by one and the number of internal plant branches stays the same, and in a coalescence of two internal branches, their number is reduced by one.  $\square$

Obviously, the expected total length of external branches is then given by  $e_{n,0,m,0}^{(a)} + e_{n,0,m,0}^{(d)}$ . Note that proceeding as in Proposition S1.2, we could also give recursions for the variances of these quantities.

## Expectation and variance of the number of segregating sites

**Proposition S1.4.** *For  $n, m \in \mathbb{N}_0$  we have*

$$\mathbb{E}_{n,m}[S] = \frac{\theta_1}{2} l_{n,m}^{(a)} + \frac{\theta_2}{2} l_{n,m}^{(d)},$$

and

$$\mathbb{V}_{n,m}[S] = \frac{\theta_1}{2} l_{n,m}^{(a)} + \frac{\theta_2}{2} l_{n,m}^{(d)} + \frac{\theta_1^2}{4} w_{n,m}^{(a)} + \frac{\theta_2^2}{4} w_{n,m}^{(d)} + \frac{\theta_1 \theta_2}{2} (w_{n,m}^{a,d} - l_{n,m}^{(a)} l_{n,m}^{(d)}),$$

where  $l_{n,m}^{(a)}, l_{n,m}^{(d)}, w_{n,m}^{(a)}, w_{n,m}^{(d)}$  and  $w_{n,m}^{(a,d)}$  are given by Proposition S1.2.

*Proof of Proposition S1.4.* Observe that conditional on the total lengths  $L^{(a)}, L^{(d)}$ , the number of segregating sites is the sum of two independent Poisson random variables with parameters  $\theta_1 L^{(a)}/2$  and  $\theta_2 L^{(d)}/2$ , respectively. Hence, if an ancestral line is in the plant state for a period of time of length  $L > 0$ , the expected number of mutations that occur in this period is  $L\theta_1/2$ . Similarly, in a period of length  $L$  when the ancestral line is a seed, the expected number of mutations is  $L\theta_2/2$ . Thus the first result follows directly from Proposition S1.2.

For the second result, we apply the law of total variance and obtain similarly that

$$\begin{aligned} \mathbb{V}_{n,m}(S) &= \mathbb{E}_{n,m}[\mathbb{V}(S \mid L^{(a)}, L^{(d)})] + \mathbb{V}_{n,m}(\mathbb{E}[S \mid L^{(a)}, L^{(d)}]) \\ &= \mathbb{E}_{n,m} \left[ \frac{\theta_1}{2} L^{(a)} + \frac{\theta_2}{2} L^{(d)} \right] + \mathbb{V}_{n,m} \left( \frac{\theta_1}{2} L^{(a)} + \frac{\theta_2}{2} L^{(d)} \right) \\ &= \frac{\theta_1}{2} l_{n,m}^{(a)} + \frac{\theta_2}{2} l_{n,m}^{(d)} + \frac{\theta_1^2}{4} w_{n,m}^{(a)} + \frac{\theta_2^2}{4} w_{n,m}^{(d)} + 2 \frac{\theta_1}{2} \frac{\theta_2}{2} \text{Cov}_{n,m}(L^{(a)}, L^{(d)}). \end{aligned}$$

□

It is possible to directly derive a recursion for the number of segregating sites without explicitly passing through calculating the tree lengths. Since it may be of use we state it here. Let

$$s_{n,m} := \mathbb{E}_{n,m}[S], \quad \text{and} \quad z_{n,m} := \mathbb{V}_{n,m}(S).$$

**Proposition S1.5** (Alternative recursion). *Let  $n, m \in \mathbb{N}_0$ . Then*

$$s_{n,m} = \left( \frac{\theta_1}{2} n + \frac{\theta_2}{2} m \right) \lambda_{n,m}^{-1} + \alpha_{n,m} s_{n-1,m} + \beta_{n,m} s_{n-1,m+1} + \gamma_{n,m} s_{n+1,m-1} \quad (\text{S8})$$

$$\begin{aligned} z_{n,m} &= \left( \frac{\theta_1}{2} n + \frac{\theta_2}{2} m \right) \lambda_{n,m}^{-1} + \left( \frac{\theta_1}{2} n + \frac{\theta_2}{2} m \right)^2 \lambda_{n,m}^{-2} \\ &\quad + \alpha_{n,m} z_{n-1,m} + \beta_{n,m} z_{n-1,m+1} + \gamma_{n,m} z_{n+1,m-1} \\ &\quad + \alpha_{n,m} s_{n-1,m}^2 + \beta_{n,m} s_{n-1,m+1}^2 + \gamma_{n,m} s_{n+1,m-1}^2 \\ &\quad - \left( \alpha_{n,m} s_{n-1,m} + \beta_{n,m} s_{n-1,m+1} + \gamma_{n,m} s_{n+1,m-1} \right)^2. \end{aligned} \quad (\text{S9})$$

*Proof of Proposition S1.5.* Let  $\sigma_1$  denote the number of mutations that occur until time  $\tau_1$ , which was defined in the proof of Proposition S1.1. Given  $\tau_1 = t$ , we know that  $\sigma_1$  is the sum of two independent Poisson random variables with parameters  $\theta_1 nt$  and  $\theta_2 mt$ , respectively. As in the previous proof we obtain

$$\begin{aligned} s_{n,m} &= \mathbb{E}_{n,m}[\sigma_1] + \mathbb{E}_{n,m}[\mathbb{E}_{N_{\tau_1}, M_{\tau_1}}[S]] \\ &= \left(\frac{\theta_1}{2}n + \frac{\theta_2}{2}m\right) \mathbb{E}_{n,m}[\tau_1] + \alpha_{n,m}s_{n-1,m} + \beta_{n,m}s_{n-1,m+1} + \gamma_{n,m}s_{n+1,m-1} \end{aligned}$$

and

$$z_{n,m} = \mathbb{V}_{n,m}(\sigma_1) + \mathbb{E}_{n,m}[\mathbb{V}_{N_{\tau_1}, M_{\tau_1}}(S)] + \mathbb{V}_{n,m}(\mathbb{E}_{N_{\tau_1}, M_{\tau_1}}[S]).$$

Once more using the law of total variance we obtain

$$\begin{aligned} \mathbb{V}_{n,m}[\sigma_1] &= \mathbb{E}_{n,m}[\mathbb{V}_{n,m}(\sigma_1 | \tau_1)] + \mathbb{V}_{n,m}(\mathbb{E}_{n,m}[\sigma_1 | \tau_1]) \\ &= \left(\frac{\theta_1}{2}n + \frac{\theta_2}{2}m\right) \mathbb{E}_{n,m}[\tau_1] + \left(\frac{\theta_1}{2}n + \frac{\theta_2}{2}m\right)^2 \mathbb{V}_{n,m}[\tau_1] \\ &= \left(\frac{\theta_1}{2}n + \frac{\theta_2}{2}m\right) \lambda_{n,m}^{-1} + \left(\frac{\theta_1}{2}n + \frac{\theta_2}{2}m\right)^2 \lambda_{n,m}^{-2}. \end{aligned} \tag{S10}$$

The same calculations as in the proof of Proposition S1.1 lead to

$$\mathbb{E}_{n,m}[\mathbb{V}_{N_{\tau_1}, M_{\tau_1}}(S)] = \alpha_{n,m}z_{n-1,m} + \beta_{n,m}z_{n-1,m+1} + \gamma_{n,m}z_{n+1,m-1},$$

and

$$\begin{aligned} \mathbb{V}_{n,m}(\mathbb{E}_{N_{\tau_1}, M_{\tau_1}}[S]) &= \alpha_{n,m}s_{n-1,m}^2 + \beta_{n,m}s_{n-1,m+1}^2 + \gamma_{n,m}s_{n+1,m-1}^2 \\ &\quad - (\alpha_{n,m}s_{n-1,m} + \beta_{n,m}s_{n-1,m+1} + \gamma_{n,m}s_{n+1,m-1})^2. \end{aligned}$$

□

## Expected value of average pairwise differences ( $\pi$ )

Recall the definition (19) of average pairwise difference  $\pi = \binom{N_0+M_0}{2}^{-1} \sum_{(i,j): i < j} K_{i,j}$ .

**Proposition S1.6.** *For  $n, m \in \mathbb{N}_0$  we have*

$$\mathbb{E}_{n,m}[\pi] = \frac{1}{\binom{n+m}{2}} \left\{ \binom{n}{2} \left( \frac{\theta_1}{2} l_{2,0}^{(a)} + \frac{\theta_2}{2} l_{2,0}^{(d)} \right) + nm \left( \frac{\theta_1}{2} l_{1,1}^{(a)} + \frac{\theta_2}{2} l_{1,1}^{(d)} \right) + \binom{m}{2} \left( \frac{\theta_1}{2} l_{0,1}^{(a)} + \frac{\theta_2}{2} l_{0,1}^{(d)} \right) \right\}$$

*Proof of Proposition S1.6.* By definition

$$\mathbb{E}_{n,m}[\pi] = \frac{1}{\binom{n+m}{2}} \sum_{1 \leq i < j \leq n+m} \mathbb{E}_{n,m}[K_{i,j}].$$

When comparing two individuals their *pairwise* differences in the infinite sites model coincide with the number of mutations that occurred along the branches of their corresponding sub-tree and are thus given the product of the mutation rate and length of the branches. Therefore,  $\mathbb{E}_{n,m}[K_{i,j}]$  actually only depends on whether  $i, j$  are dormant or active individuals. We obtain

$$\mathbb{E}_{n,m}[K_{i,j}] = \begin{cases} \frac{\theta_1}{2} l_{2,0}^{(a)} + \frac{\theta_2}{2} l_{2,0}^{(d)}, & \text{if } i, j \text{ are active} \\ \frac{\theta_1}{2} l_{1,1}^{(a)} + \frac{\theta_2}{2} l_{1,1}^{(d)}, & \text{if } i \text{ is active and } j \text{ dormant} \\ \frac{\theta_1}{2} l_{0,2}^{(a)} + \frac{\theta_2}{2} l_{0,2}^{(d)}, & \text{if } i, j \text{ are dormant.} \end{cases}$$

Substituting this into the above equation, the result follows. □



## File S2 Solving the recursions numerically

Since all the recursions have the same general form, a generic method for solving them numerically will now be given. The idea is to use standard linear algebra methods to solve the standard linear system  $A\underline{t} = \underline{b}$ . Let  $\underline{t} = (t_0, t_1, \dots, t_{n+m})$  denote the vector of quantities we are solving for, where we order them according to number of active lines. For any given number  $n$  of active blocks and  $m$  of inactive blocks, so the current total number of blocks is  $n + m$ , write  $\underline{t} = (t_0, t_1, \dots, t_{n+m})$  where  $t_i \equiv t_{i, n+m-i}$ , and write  $\ell := n + m$ . Let  $\mathbf{A}$ ,  $\mathbf{B}$ ,  $\mathbf{C}$  denote square  $(\ell + 1) \times (\ell + 1)$  matrices whose rows and columns are enumerated from 0; with non-zero terms  $a_{i-1, i} = \alpha_{i, \ell-i}$ ,  $b_{i, i-1} = \beta_{i, \ell-i}$ ,  $c_{i, i+1} = \gamma_{i, \ell-i}$ , and let  $\mathbf{I}$  denote a  $(\ell + 1) \times (\ell + 1)$  identity matrix. Assume, by way of example, we are solving the recursion (10) for expected time to most recent common ancestor. Define the vector  $\underline{k}$  with elements  $k_i = 1/\lambda_{i, \ell-i}$ , and  $\underline{r} = (0, r_0, r_1, \dots, r_{n+m-1})$  where  $r_j = t_{j, n+m-j-1}$ .

The recursion in Proposition (S1.1) can now be written

$$\underline{t} = \underline{k} + \mathbf{A}\underline{r} + (\mathbf{B} + \mathbf{C})\underline{t}$$

Assuming we solve for  $\underline{t}$  iteratively, starting from  $n + m = 2$ ,  $\underline{r}$  is a vector of known constants; hence

$$\underline{s} = (\mathbf{I} - \mathbf{B} - \mathbf{C})^{-1}(\underline{k} + \mathbf{A}\underline{r})$$

where  $\mathbf{I} - \mathbf{B} - \mathbf{C}$  should be non-singular and  $(\mathbf{I} - \mathbf{B} - \mathbf{C})^{-1}$  easily computable.

Similar methods may be applied to the other recursions.

**Table S1: Relative expected lengths of external branches.** The relative expected lengths of external branches  $e_{\underline{n}}^{(a)} / (e_{\underline{n}}^{(a)} + e_{\underline{n}}^{(d)})$  from Prop. S1.3 with sample configuration  $\underline{n} = (10, 0, 10, 0)$ .

| $K = 0.01$ , values of $d$ |          |         |         |         |        |        |
|----------------------------|----------|---------|---------|---------|--------|--------|
| $c$                        | 0.001    | 0.01    | 0.1     | 1       | 10     | 100    |
| 0.001                      | 0.0161   | 0.0449  | 0.0426  | 0.0195  | 0.0869 | 0.338  |
| 0.01                       | 0.00973  | 0.0161  | 0.0457  | 0.0521  | 0.0928 | 0.338  |
| 0.1                        | 0.00914  | 0.00987 | 0.0166  | 0.0519  | 0.116  | 0.335  |
| 1                          | 0.00955  | 0.00963 | 0.0104  | 0.0183  | 0.0756 | 0.289  |
| 10                         | 0.00985  | 0.00986 | 0.00995 | 0.0108  | 0.0194 | 0.095  |
| 100                        | 0.0099   | 0.0099  | 0.00991 | 0.00999 | 0.0109 | 0.0196 |
| $K = 1$ , values of $d$    |          |         |         |         |        |        |
| $c$                        | 0.001    | 0.01    | 0.1     | 1       | 10     | 100    |
| 0.001                      | 0.0313   | 0.02    | 0.0876  | 0.338   | 0.725  | 0.954  |
| 0.01                       | 0.0516   | 0.0499  | 0.0984  | 0.339   | 0.725  | 0.954  |
| 0.1                        | 0.116    | 0.12    | 0.155   | 0.349   | 0.723  | 0.953  |
| 1                          | 0.287    | 0.289   | 0.301   | 0.396   | 0.704  | 0.946  |
| 10                         | 0.449    | 0.45    | 0.452   | 0.471   | 0.605  | 0.884  |
| 100                        | 0.494    | 0.494   | 0.494   | 0.496   | 0.517  | 0.659  |
| $c = 1$ , values of $d$    |          |         |         |         |        |        |
| $K$                        | 0.001    | 0.01    | 0.1     | 1       | 10     | 100    |
| 0.001                      | 0.000996 | 0.001   | 0.00109 | 0.00198 | 0.0104 | 0.071  |
| 0.01                       | 0.00955  | 0.00963 | 0.0104  | 0.0183  | 0.0756 | 0.289  |
| 0.1                        | 0.0705   | 0.071   | 0.0756  | 0.115   | 0.301  | 0.689  |
| 1                          | 0.287    | 0.289   | 0.301   | 0.396   | 0.704  | 0.946  |
| 10                         | 0.687    | 0.689   | 0.704   | 0.797   | 0.95   | 0.994  |
| 100                        | 0.945    | 0.946   | 0.95    | 0.971   | 0.995  | 0.999  |
| $c = 0.01$ , values of $d$ |          |         |         |         |        |        |
| $K$                        | 0.001    | 0.01    | 0.1     | 1       | 10     | 100    |
| 0.001                      | 0.00109  | 0.00195 | 0.00973 | 0.0442  | 0.0522 | 0.0928 |
| 0.01                       | 0.00973  | 0.0161  | 0.0457  | 0.0521  | 0.0928 | 0.338  |
| 0.1                        | 0.0457   | 0.0539  | 0.0516  | 0.0934  | 0.338  | 0.725  |
| 1                          | 0.0516   | 0.0499  | 0.0984  | 0.339   | 0.725  | 0.954  |
| 10                         | 0.0984   | 0.143   | 0.352   | 0.726   | 0.954  | 0.995  |
| 100                        | 0.352    | 0.449   | 0.74    | 0.954   | 0.995  | 0.999  |

**Table S2: Expected length of external branches.** The expected total lengths of external branches  $(e_{(n)}^{(a)}, e_{(n)}^{(d)})$  from Prop. S1.3 with sample configuration  $\underline{n} = (10, 0, 0, 0)$ , as a function of  $c$  and  $K$ . The expected length  $e_{(n)} = 2$  when associated with the Kingman coalescent (FU, 1995).

| $c = 1$ , values of $d$    |                      |                 |                 |
|----------------------------|----------------------|-----------------|-----------------|
| $K$                        | 0.001                | 1               | 100             |
| 0.001                      | (1.22e+03, 1.22e+06) | (610, 3.05e+05) | (14.2, 141)     |
| 0.01                       | (124, 1.24e+04)      | (63, 3.15e+03)  | (3.4, 3.36)     |
| 0.1                        | (14.3, 143)          | (8.28, 41.4)    | (2.18, 0.216)   |
| 1                          | (3.41, 3.4)          | (2.77, 1.39)    | (2.02, 0.02)    |
| 10                         | (2.18, 0.218)        | (2.1, 0.105)    | (2, 0.00198)    |
| 100                        | (2.02, 0.0202)       | (2.01, 0.01)    | (2, 0.000198)   |
| $K = 0.01$ , values of $d$ |                      |                 |                 |
| $c$                        | 0.001                | 1               | 100             |
| 0.001                      | (56.7, 2.83e+03)     | (2.03, 0.203)   | (2, 0.002)      |
| 0.01                       | (102, 9.28e+03)      | (2.68, 2.65)    | (2.01, 0.0201)  |
| 0.1                        | (111, 1.1e+04)       | (11.5, 104)     | (2.12, 0.211)   |
| 1                          | (124, 1.24e+04)      | (63, 3.15e+03)  | (3.4, 3.36)     |
| 10                         | (174, 1.74e+04)      | (158, 1.44e+04) | (17.9, 163)     |
| 100                        | (198, 1.98e+04)      | (196, 1.94e+04) | (100, 5.01e+03) |

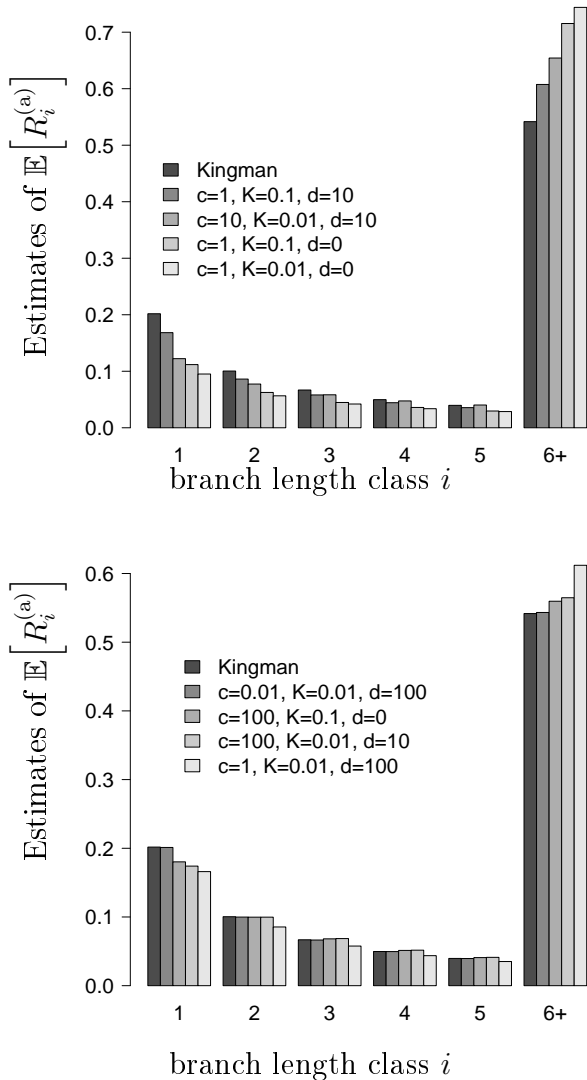

**Figure S1: Expected normalised branch lengths.** Estimates of the expected normalised branch lengths  $\mathbb{E}[R_i^{(a)}]$ , with  $R_i^{(a)} := \frac{B_i^{(a)}}{B^{(a)}}$  with  $B_i^{(a)}$  denoting the random total length of *active* branches subtending  $i$  leaves, and  $B^{(a)}$  the sum of  $B_i^{(a)}$ ; with all  $n = 100$  sampled lines assumed active, and values of  $c, K, d$  as shown. The values labelled 6+ denote the collected tail  $\bar{R}_6^{(a)} + \dots + \bar{R}_{99}^{(a)}$ . All estimates based on  $10^5$  replicates.

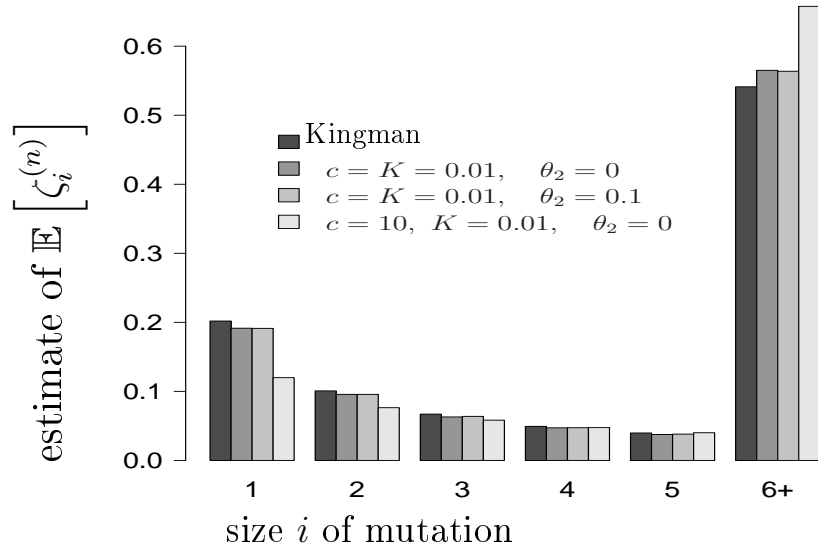

**Figure S2: Expected normalised site-frequency spectrum.** Estimates  $\bar{\zeta}_i^{(n)}$   $\left(\zeta_i^{(n)} = \frac{\xi_i^{(n)}}{|\xi^{(n)}|}\right)$  where  $|\xi^{(n)}| = \xi_1^{(n)} + \dots + \xi_{n-1}^{(n)}$  denotes the total number of segregating sites, of expected normalized spectra  $\mathbb{E} \left[ \zeta_i^{(n)} \right]$  with all  $n = 100$  sampled lines assumed active, active mutation rate  $\theta_1 = 2$ , and with  $c$ ,  $K$ , and inactive mutation rate  $\theta_2$  as shown. The entries labelled ‘6+’ represent the collected tail  $\bar{\zeta}_{6+}^{(n)} = \sum_{i \geq 6} \bar{\zeta}_i^{(n)}$ . Estimates are based on  $10^5$  replicates.

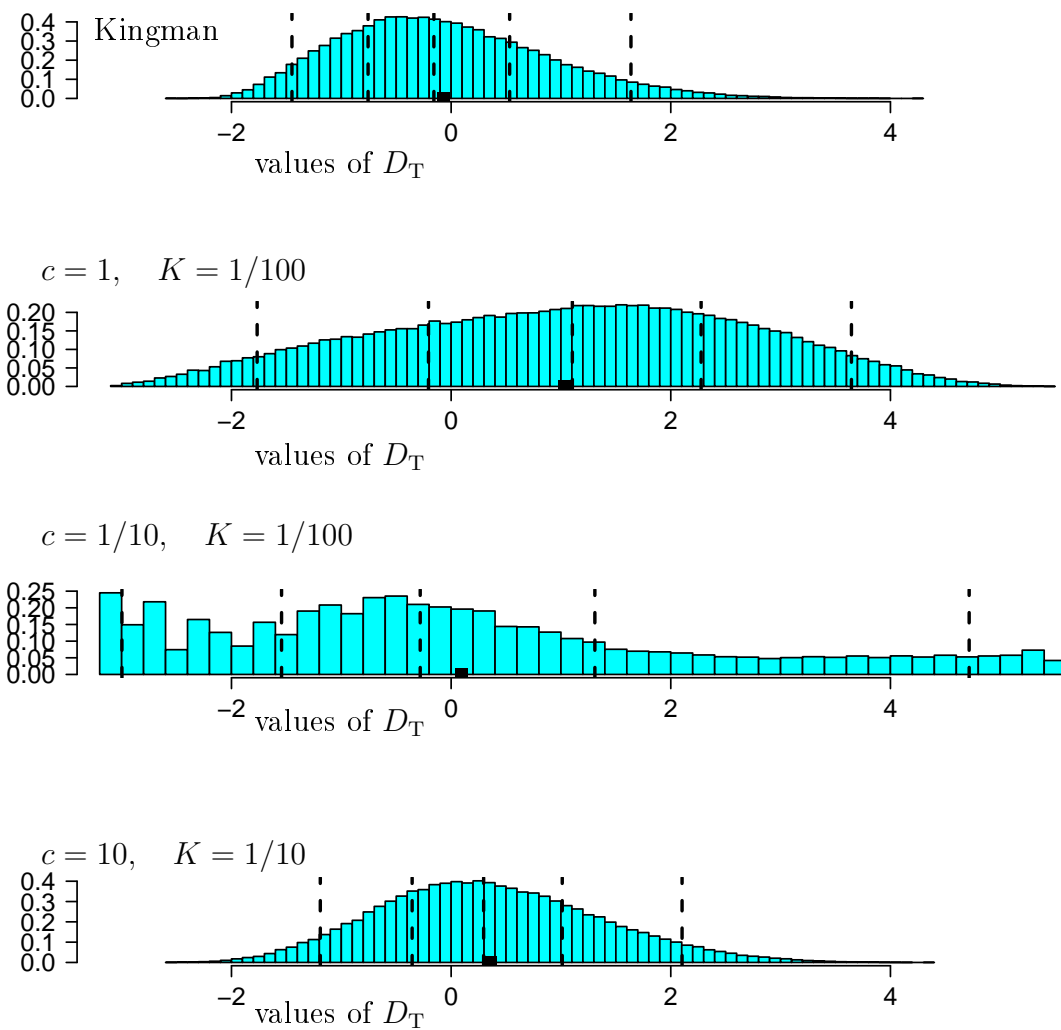

**Figure S3: Tajima's statistic  $D_T$  (24).** Estimates of the distribution of Tajima's statistic  $D_T$  (24) with all  $n = 100$  sampled lines assumed active,  $\theta_1 = 2$ ,  $\theta_2 = 0$ . The vertical broken lines are the 5%, 25%, 50%, 75%, 95% quantiles and the black square (■) denotes the mean. The entries are normalised to have unit mass 1. The histograms are drawn on the same horizontal scale. Based on  $10^5$  replicates.
