# Supplementary material
Source: PubMed Central journal article supplement (PMC4512552)
Supplement: 10.1534_115.176818_genetics.115.176818-2.pdf [file 10.1534_115.176818_genetics.115.176818-2.pdf]

**Table S2: Expected length of external branches.** The expected total lengths of external branches  $(e_{(n)}^{(a)}, e_{(n)}^{(d)})$  from Prop. S1.3 with sample configuration  $\underline{n} = (10, 0, 0, 0)$ , as a function of  $c$  and  $K$ . The expected length  $e_{(n)} = 2$  when associated with the Kingman coalescent (FU, 1995).

| $c = 1$ , values of $d$    |                      |                 |                 |
|----------------------------|----------------------|-----------------|-----------------|
| $K$                        | 0.001                | 1               | 100             |
| 0.001                      | (1.22e+03, 1.22e+06) | (610, 3.05e+05) | (14.2, 141)     |
| 0.01                       | (124, 1.24e+04)      | (63, 3.15e+03)  | (3.4, 3.36)     |
| 0.1                        | (14.3, 143)          | (8.28, 41.4)    | (2.18, 0.216)   |
| 1                          | (3.41, 3.4)          | (2.77, 1.39)    | (2.02, 0.02)    |
| 10                         | (2.18, 0.218)        | (2.1, 0.105)    | (2, 0.00198)    |
| 100                        | (2.02, 0.0202)       | (2.01, 0.01)    | (2, 0.000198)   |
| $K = 0.01$ , values of $d$ |                      |                 |                 |
| $c$                        | 0.001                | 1               | 100             |
| 0.001                      | (56.7, 2.83e+03)     | (2.03, 0.203)   | (2, 0.002)      |
| 0.01                       | (102, 9.28e+03)      | (2.68, 2.65)    | (2.01, 0.0201)  |
| 0.1                        | (111, 1.1e+04)       | (11.5, 104)     | (2.12, 0.211)   |
| 1                          | (124, 1.24e+04)      | (63, 3.15e+03)  | (3.4, 3.36)     |
| 10                         | (174, 1.74e+04)      | (158, 1.44e+04) | (17.9, 163)     |
| 100                        | (198, 1.98e+04)      | (196, 1.94e+04) | (100, 5.01e+03) |
