# Supplementary material
Source: PubMed Central journal article supplement (PMC4512552)
Supplement: 10.1534_115.176818_genetics.115.176818-3.pdf [file 10.1534_115.176818_genetics.115.176818-3.pdf]

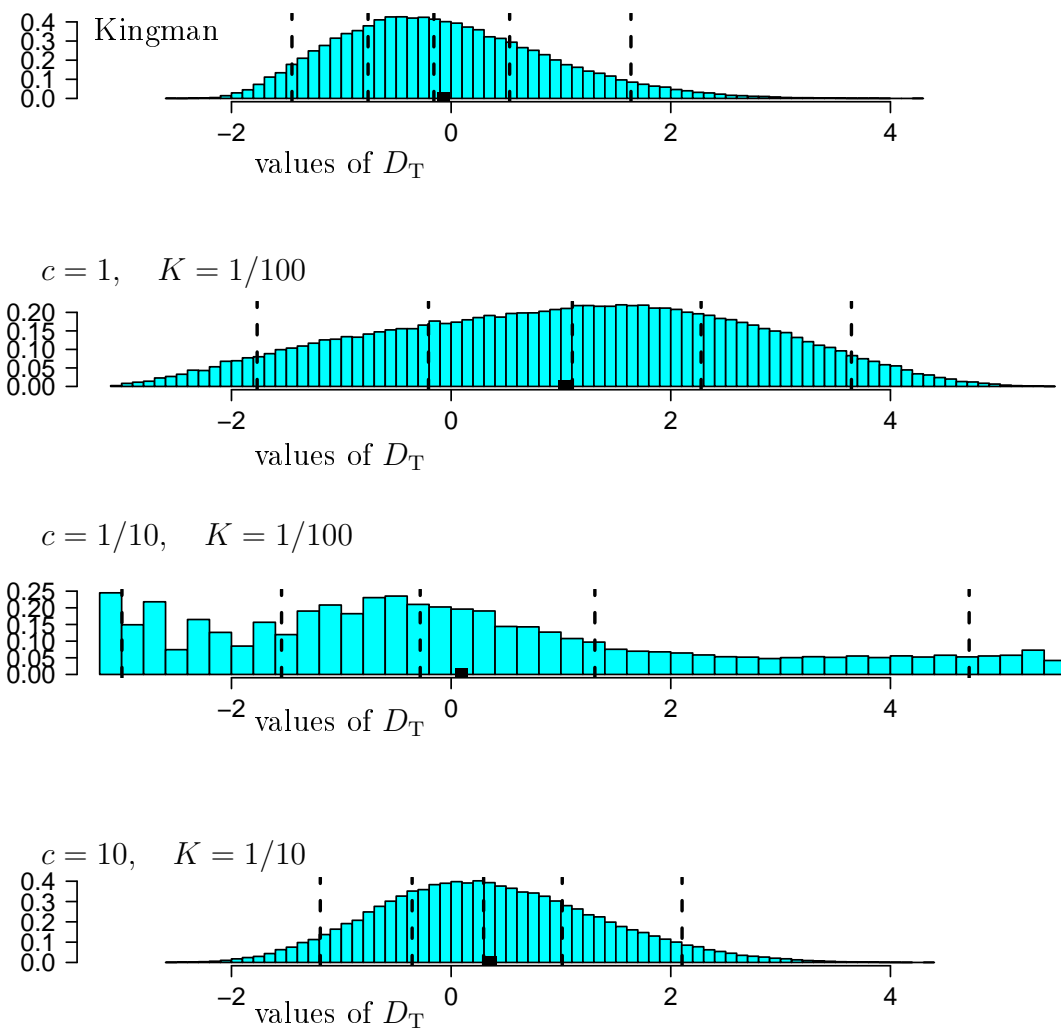

**Figure S3: Tajima's statistic  $D_T$  (24).** Estimates of the distribution of Tajima's statistic  $D_T$  (24) with all  $n = 100$  sampled lines assumed active,  $\theta_1 = 2$ ,  $\theta_2 = 0$ . The vertical broken lines are the 5%, 25%, 50%, 75%, 95% quantiles and the black square (■) denotes the mean. The entries are normalised to have unit mass 1. The histograms are drawn on the same horizontal scale. Based on  $10^5$  replicates.
