# Supplementary material
Source: PubMed Central journal article supplement (PMC4512552)
Supplement: 10.1534_115.176818_genetics.115.176818-4.pdf [file 10.1534_115.176818_genetics.115.176818-4.pdf]

**Table S1: Relative expected lengths of external branches.** The relative expected lengths of external branches  $e_{\underline{n}}^{(a)} / (e_{\underline{n}}^{(a)} + e_{\underline{n}}^{(d)})$  from Prop. S1.3 with sample configuration  $\underline{n} = (10, 0, 10, 0)$ .

| $K = 0.01$ , values of $d$ |          |         |         |         |        |        |
|----------------------------|----------|---------|---------|---------|--------|--------|
| $c$                        | 0.001    | 0.01    | 0.1     | 1       | 10     | 100    |
| 0.001                      | 0.0161   | 0.0449  | 0.0426  | 0.0195  | 0.0869 | 0.338  |
| 0.01                       | 0.00973  | 0.0161  | 0.0457  | 0.0521  | 0.0928 | 0.338  |
| 0.1                        | 0.00914  | 0.00987 | 0.0166  | 0.0519  | 0.116  | 0.335  |
| 1                          | 0.00955  | 0.00963 | 0.0104  | 0.0183  | 0.0756 | 0.289  |
| 10                         | 0.00985  | 0.00986 | 0.00995 | 0.0108  | 0.0194 | 0.095  |
| 100                        | 0.0099   | 0.0099  | 0.00991 | 0.00999 | 0.0109 | 0.0196 |
| $K = 1$ , values of $d$    |          |         |         |         |        |        |
| $c$                        | 0.001    | 0.01    | 0.1     | 1       | 10     | 100    |
| 0.001                      | 0.0313   | 0.02    | 0.0876  | 0.338   | 0.725  | 0.954  |
| 0.01                       | 0.0516   | 0.0499  | 0.0984  | 0.339   | 0.725  | 0.954  |
| 0.1                        | 0.116    | 0.12    | 0.155   | 0.349   | 0.723  | 0.953  |
| 1                          | 0.287    | 0.289   | 0.301   | 0.396   | 0.704  | 0.946  |
| 10                         | 0.449    | 0.45    | 0.452   | 0.471   | 0.605  | 0.884  |
| 100                        | 0.494    | 0.494   | 0.494   | 0.496   | 0.517  | 0.659  |
| $c = 1$ , values of $d$    |          |         |         |         |        |        |
| $K$                        | 0.001    | 0.01    | 0.1     | 1       | 10     | 100    |
| 0.001                      | 0.000996 | 0.001   | 0.00109 | 0.00198 | 0.0104 | 0.071  |
| 0.01                       | 0.00955  | 0.00963 | 0.0104  | 0.0183  | 0.0756 | 0.289  |
| 0.1                        | 0.0705   | 0.071   | 0.0756  | 0.115   | 0.301  | 0.689  |
| 1                          | 0.287    | 0.289   | 0.301   | 0.396   | 0.704  | 0.946  |
| 10                         | 0.687    | 0.689   | 0.704   | 0.797   | 0.95   | 0.994  |
| 100                        | 0.945    | 0.946   | 0.95    | 0.971   | 0.995  | 0.999  |
| $c = 0.01$ , values of $d$ |          |         |         |         |        |        |
| $K$                        | 0.001    | 0.01    | 0.1     | 1       | 10     | 100    |
| 0.001                      | 0.00109  | 0.00195 | 0.00973 | 0.0442  | 0.0522 | 0.0928 |
| 0.01                       | 0.00973  | 0.0161  | 0.0457  | 0.0521  | 0.0928 | 0.338  |
| 0.1                        | 0.0457   | 0.0539  | 0.0516  | 0.0934  | 0.338  | 0.725  |
| 1                          | 0.0516   | 0.0499  | 0.0984  | 0.339   | 0.725  | 0.954  |
| 10                         | 0.0984   | 0.143   | 0.352   | 0.726   | 0.954  | 0.995  |
| 100                        | 0.352    | 0.449   | 0.74    | 0.954   | 0.995  | 0.999  |
