# Supplementary material
Source: PubMed Central journal article supplement (PMC4512552)
Supplement: 10.1534_115.176818_genetics.115.176818-5.pdf [file 10.1534_115.176818_genetics.115.176818-5.pdf]

## File S2 Solving the recursions numerically

Since all the recursions have the same general form, a generic method for solving them numerically will now be given. The idea is to use standard linear algebra methods to solve the standard linear system  $A\underline{t} = \underline{b}$ . Let  $\underline{t} = (t_0, t_1, \dots, t_{n+m})$  denote the vector of quantities we are solving for, where we order them according to number of active lines. For any given number  $n$  of active blocks and  $m$  of inactive blocks, so the current total number of blocks is  $n + m$ , write  $\underline{t} = (t_0, t_1, \dots, t_{n+m})$  where  $t_i \equiv t_{i, n+m-i}$ , and write  $\ell := n + m$ . Let  $\mathbf{A}$ ,  $\mathbf{B}$ ,  $\mathbf{C}$  denote square  $(\ell + 1) \times (\ell + 1)$  matrices whose rows and columns are enumerated from 0; with non-zero terms  $a_{i-1, i} = \alpha_{i, \ell-i}$ ,  $b_{i, i-1} = \beta_{i, \ell-i}$ ,  $c_{i, i+1} = \gamma_{i, \ell-i}$ , and let  $\mathbf{I}$  denote a  $(\ell + 1) \times (\ell + 1)$  identity matrix. Assume, by way of example, we are solving the recursion (10) for expected time to most recent common ancestor. Define the vector  $\underline{k}$  with elements  $k_i = 1/\lambda_{i, \ell-i}$ , and  $\underline{r} = (0, r_0, r_1, \dots, r_{n+m-1})$  where  $r_j = t_{j, n+m-j-1}$ .

The recursion in Proposition (S1.1) can now be written

$$\underline{t} = \underline{k} + \mathbf{A}\underline{r} + (\mathbf{B} + \mathbf{C})\underline{t}$$

Assuming we solve for  $\underline{t}$  iteratively, starting from  $n + m = 2$ ,  $\underline{r}$  is a vector of known constants; hence

$$\underline{s} = (\mathbf{I} - \mathbf{B} - \mathbf{C})^{-1}(\underline{k} + \mathbf{A}\underline{r})$$

where  $\mathbf{I} - \mathbf{B} - \mathbf{C}$  should be non-singular and  $(\mathbf{I} - \mathbf{B} - \mathbf{C})^{-1}$  easily computable.

Similar methods may be applied to the other recursions.
