# Supplementary material
Source: PubMed Central journal article supplement (PMC4512552)
Supplement: 10.1534_115.176818_genetics.115.176818-6.pdf [file 10.1534_115.176818_genetics.115.176818-6.pdf]

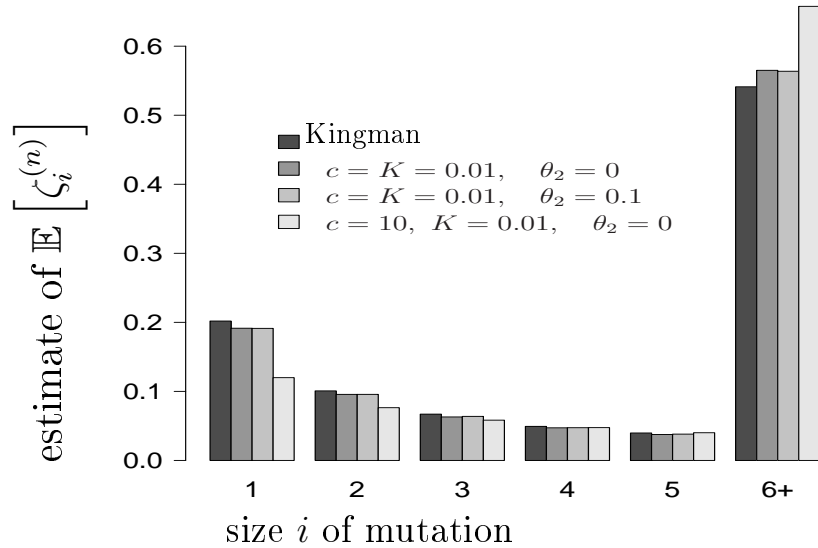

**Figure S2: Expected normalised site-frequency spectrum.** Estimates  $\bar{\zeta}_i^{(n)}$   $\left(\zeta_i^{(n)} = \frac{\xi_i^{(n)}}{|\xi^{(n)}|}\right)$  where  $|\xi^{(n)}| = \xi_1^{(n)} + \dots + \xi_{n-1}^{(n)}$  denotes the total number of segregating sites, of expected normalized spectra  $\mathbb{E} \left[ \zeta_i^{(n)} \right]$  with all  $n = 100$  sampled lines assumed active, active mutation rate  $\theta_1 = 2$ , and with  $c$ ,  $K$ , and inactive mutation rate  $\theta_2$  as shown. The entries labelled ‘6+’ represent the collected tail  $\bar{\zeta}_{6+}^{(n)} = \sum_{i \geq 6} \bar{\zeta}_i^{(n)}$ . Estimates are based on  $10^5$  replicates.
