# Supplementary material
Source: PubMed Central journal article supplement (PMC4512552)
Supplement: 10.1534_115.176818_genetics.115.176818-7.pdf [file 10.1534_115.176818_genetics.115.176818-7.pdf]

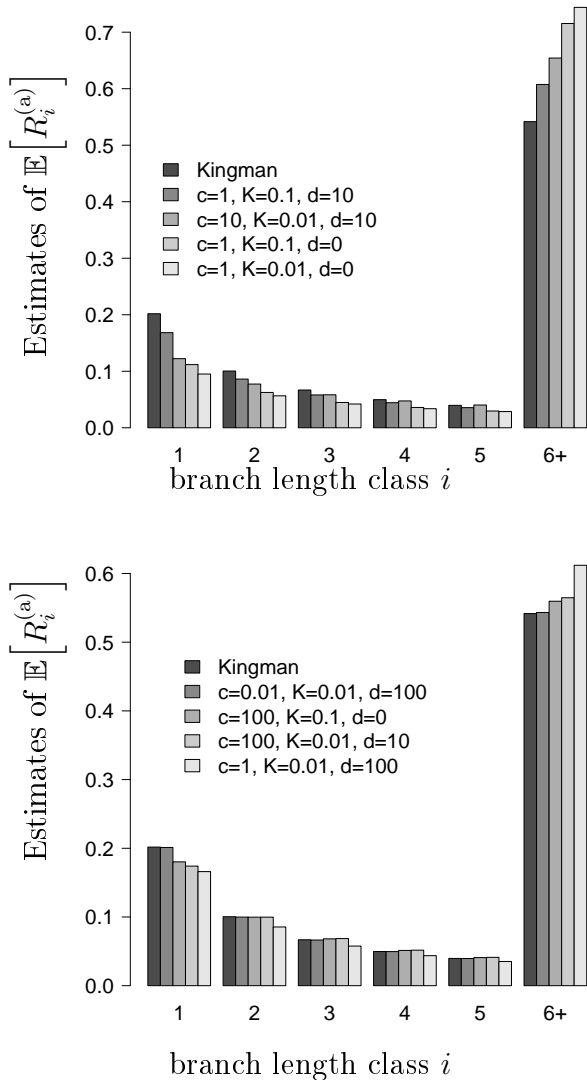

**Figure S1: Expected normalised branch lengths.** Estimates of the expected normalised branch lengths  $\mathbb{E}[R_i^{(a)}]$ , with  $R_i^{(a)} := \frac{B_i^{(a)}}{B^{(a)}}$  with  $B_i^{(a)}$  denoting the random total length of *active* branches subtending  $i$  leaves, and  $B^{(a)}$  the sum of  $B_i^{(a)}$ ; with all  $n = 100$  sampled lines assumed active, and values of  $c, K, d$  as shown. The values labelled 6+ denote the collected tail  $\bar{R}_6^{(a)} + \dots + \bar{R}_{99}^{(a)}$ . All estimates based on  $10^5$  replicates.
